# Supplementary material for: Functional Evaluation of the Visual Pathway in Patients with Multiple Sclerosis Using a Multifunction Stimulator Monitor
Source: Hindawi journal article supplement (doi:10.1155/2019/2890193), 2019-09-18
Supplement: f1 [file 2890193.f1.pdf]

| <b>Structural parameter</b>    | <b>MS</b>      | <b>Controls</b> | <b>p</b>         |
|--------------------------------|----------------|-----------------|------------------|
| <i>Macular thickness</i>       |                |                 |                  |
| Central                        | 203.42 (44.01) | 222.30 (21.38)  | <b>0.010</b>     |
| Inner superior                 | 303.46 (30.32) | 324.08 (8.91)   | <b>&lt;0.001</b> |
| Inner nasal                    | 308.16 (19.32) | 325.12 (11.71)  | <b>&lt;0.001</b> |
| Inner inferior                 | 304.51 (18.37) | 319.99 (8.84)   | <b>&lt;0.001</b> |
| Inner temporal                 | 292.22 (20.41) | 308.80 (11.33)  | <b>&lt;0.001</b> |
| Outer superior                 | 265.67 (12.46) | 273.89 (11.10)  | <b>0.001</b>     |
| Outer nasal                    | 279.21 (16.78) | 290.73 (11.99)  | <b>&lt;0.001</b> |
| Outer inferior                 | 254.79 (17.86) | 261.93 (13.65)  | <b>0.033</b>     |
| Outer temporal                 | 249.38 (14.25) | 256.45 (15.39)  | <b>0.023</b>     |
| Average                        | 270.54 (14.20) | 281.47 (11.04)  | <b>&lt;0.001</b> |
| Volume                         | 7.65 (0.40)    | 7.96 (0.31)     | <b>&lt;0.001</b> |
| <i>Ganglion cell thickness</i> |                |                 |                  |
| Total                          | 41.55 (3.91)   | 46.98 (1.90)    | <b>&lt;0.001</b> |
| Superotemporal                 | 38.86 (6.36)   | 44.35 (6.63)    | <b>&lt;0.001</b> |
| Temporal                       | 49.95 (6.90)   | 57.57 (4.03)    | <b>&lt;0.001</b> |
| Inferotemporal                 | 38.94 (7.83)   | 45.13 (5.86)    | <b>&lt;0.001</b> |
| Superonasal                    | 40.79 (5.67)   | 45.87 (5.27)    | <b>&lt;0.001</b> |
| Nasal                          | 38.77 (4.09)   | 42.45 (2.96)    | <b>&lt;0.001</b> |
| Inferonasal                    | 36.24 (7.38)   | 41.12 (4.25)    | <b>&lt;0.001</b> |

**Supplementary table 1:** Macular and peripapillary measurements (standard deviation between parenthesis) obtained with Swept Source Triton Optical coherence tomography in patients with multiple sclerosis and healthy controls. Bold letters indicate statistical significance ( $p < 0.05$ ).

Abbreviations: MS, multiple sclerosis.
